# Supplementary material for: Nucleation‐Controlled Production of Sub‐50 nm Carbon Nanotubes through Electrochemical Conversion of Carbon Dioxide in Carbonate Molten Salt
Source: Hindawi journal article supplement (doi:10.1155/2024/6616423), 2024-01-01
Supplement: f1 [file 6616423.f1.doc]

**Supplementary Material**

**Nucleation-Controlled Production of Sub-50 nm Carbon Nanotubes through Electrochemical Conversion of Carbon Dioxide in Carbonate Molten Salt**

Authors: Min Woo Park and Chan Woo Lee*

Department of Chemistry, Kookmin University, Seoul 02707, Republic of Korea

***Corresponding author:** Chan Woo Lee; **Email:** [cwlee1@kookmin.ac.kr](mailto:cwlee1@kookmin.ac.kr)

**Fig. S1** Two-hour chronopotentiometry with different borate concentrations at a current density of 25 mA cm-2.


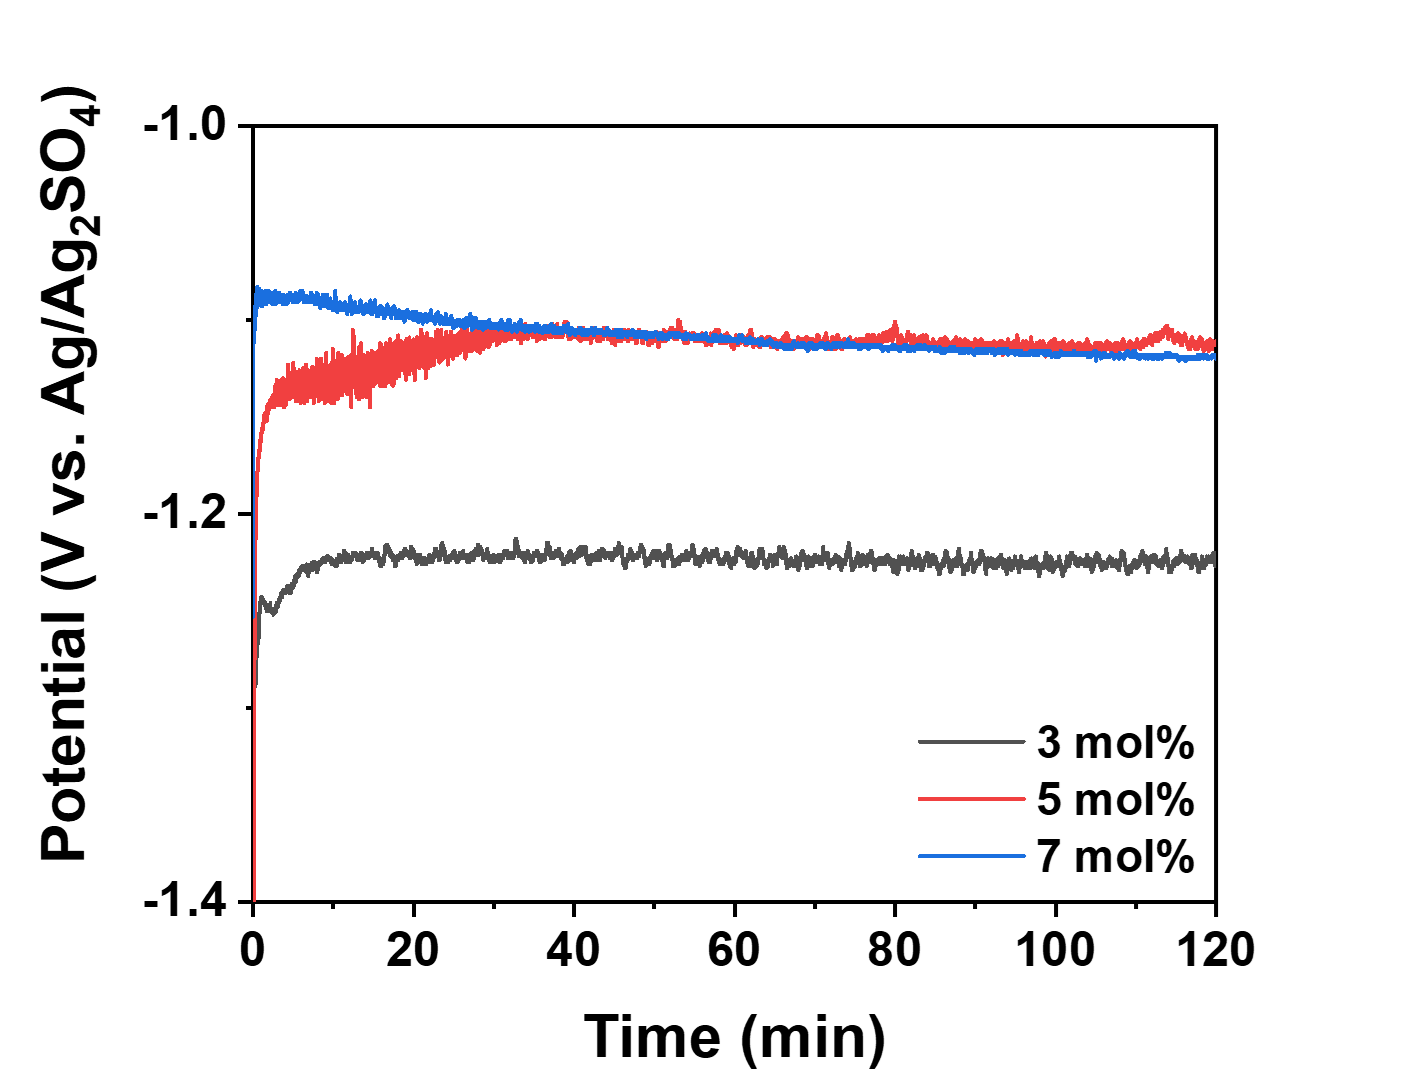


**Fig. S2** Elemental intensity of CNTs, obtained from TEM-EDS analysis.

**
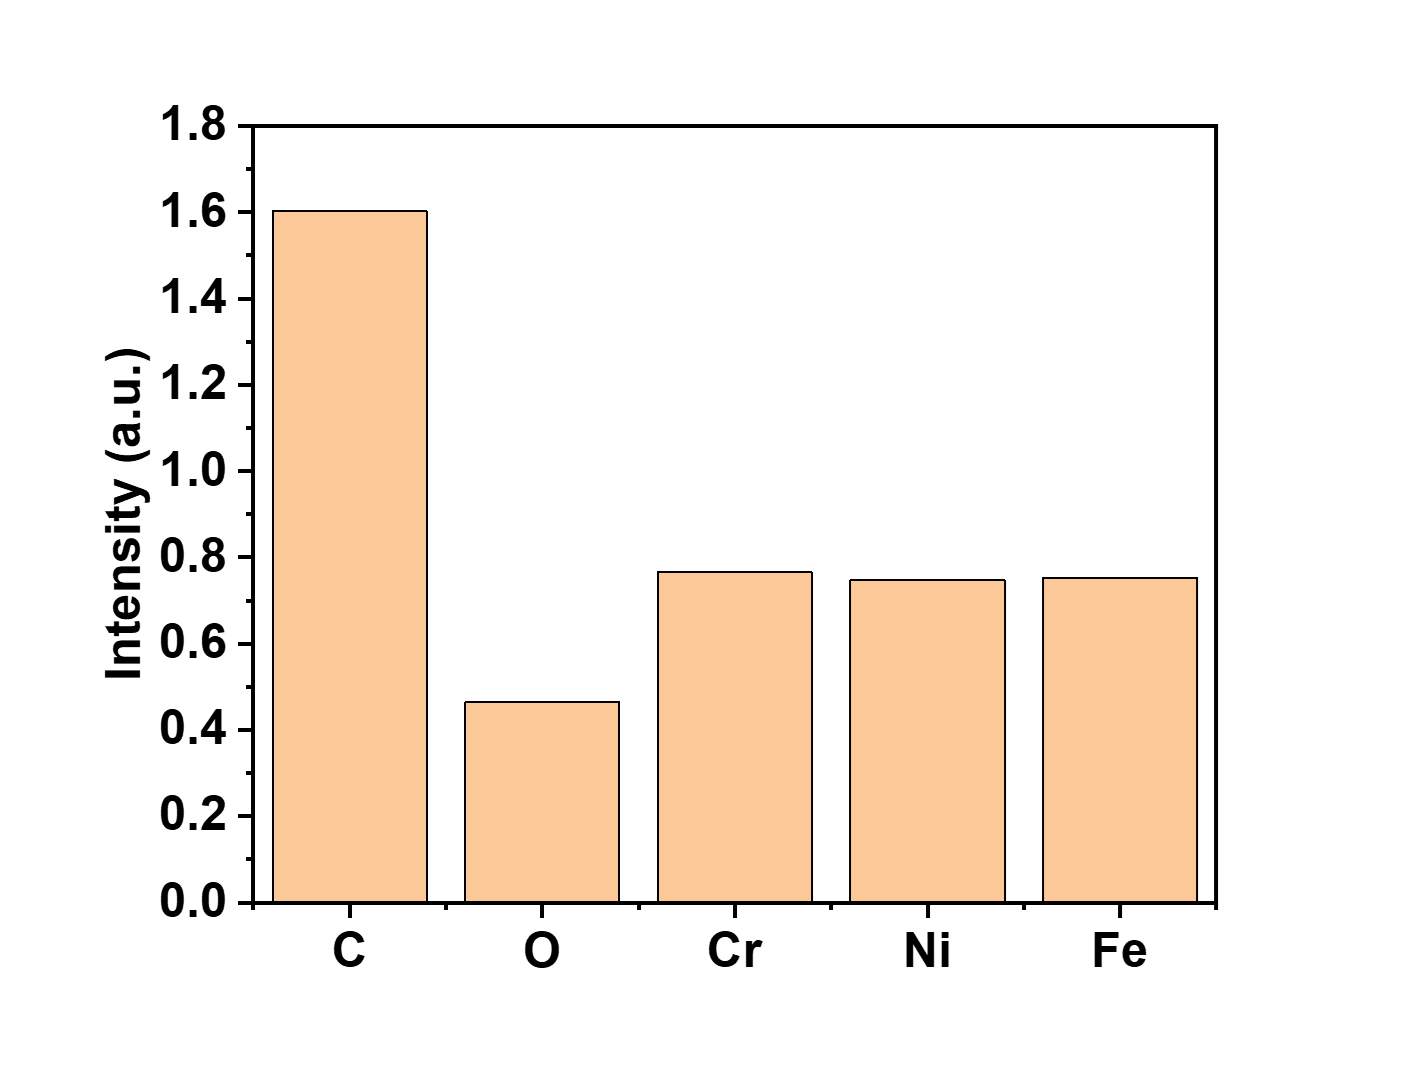
**

**Fig. S3** SEM images used for obtaining the particle size and CNT diameter distribution plot. Images.

**
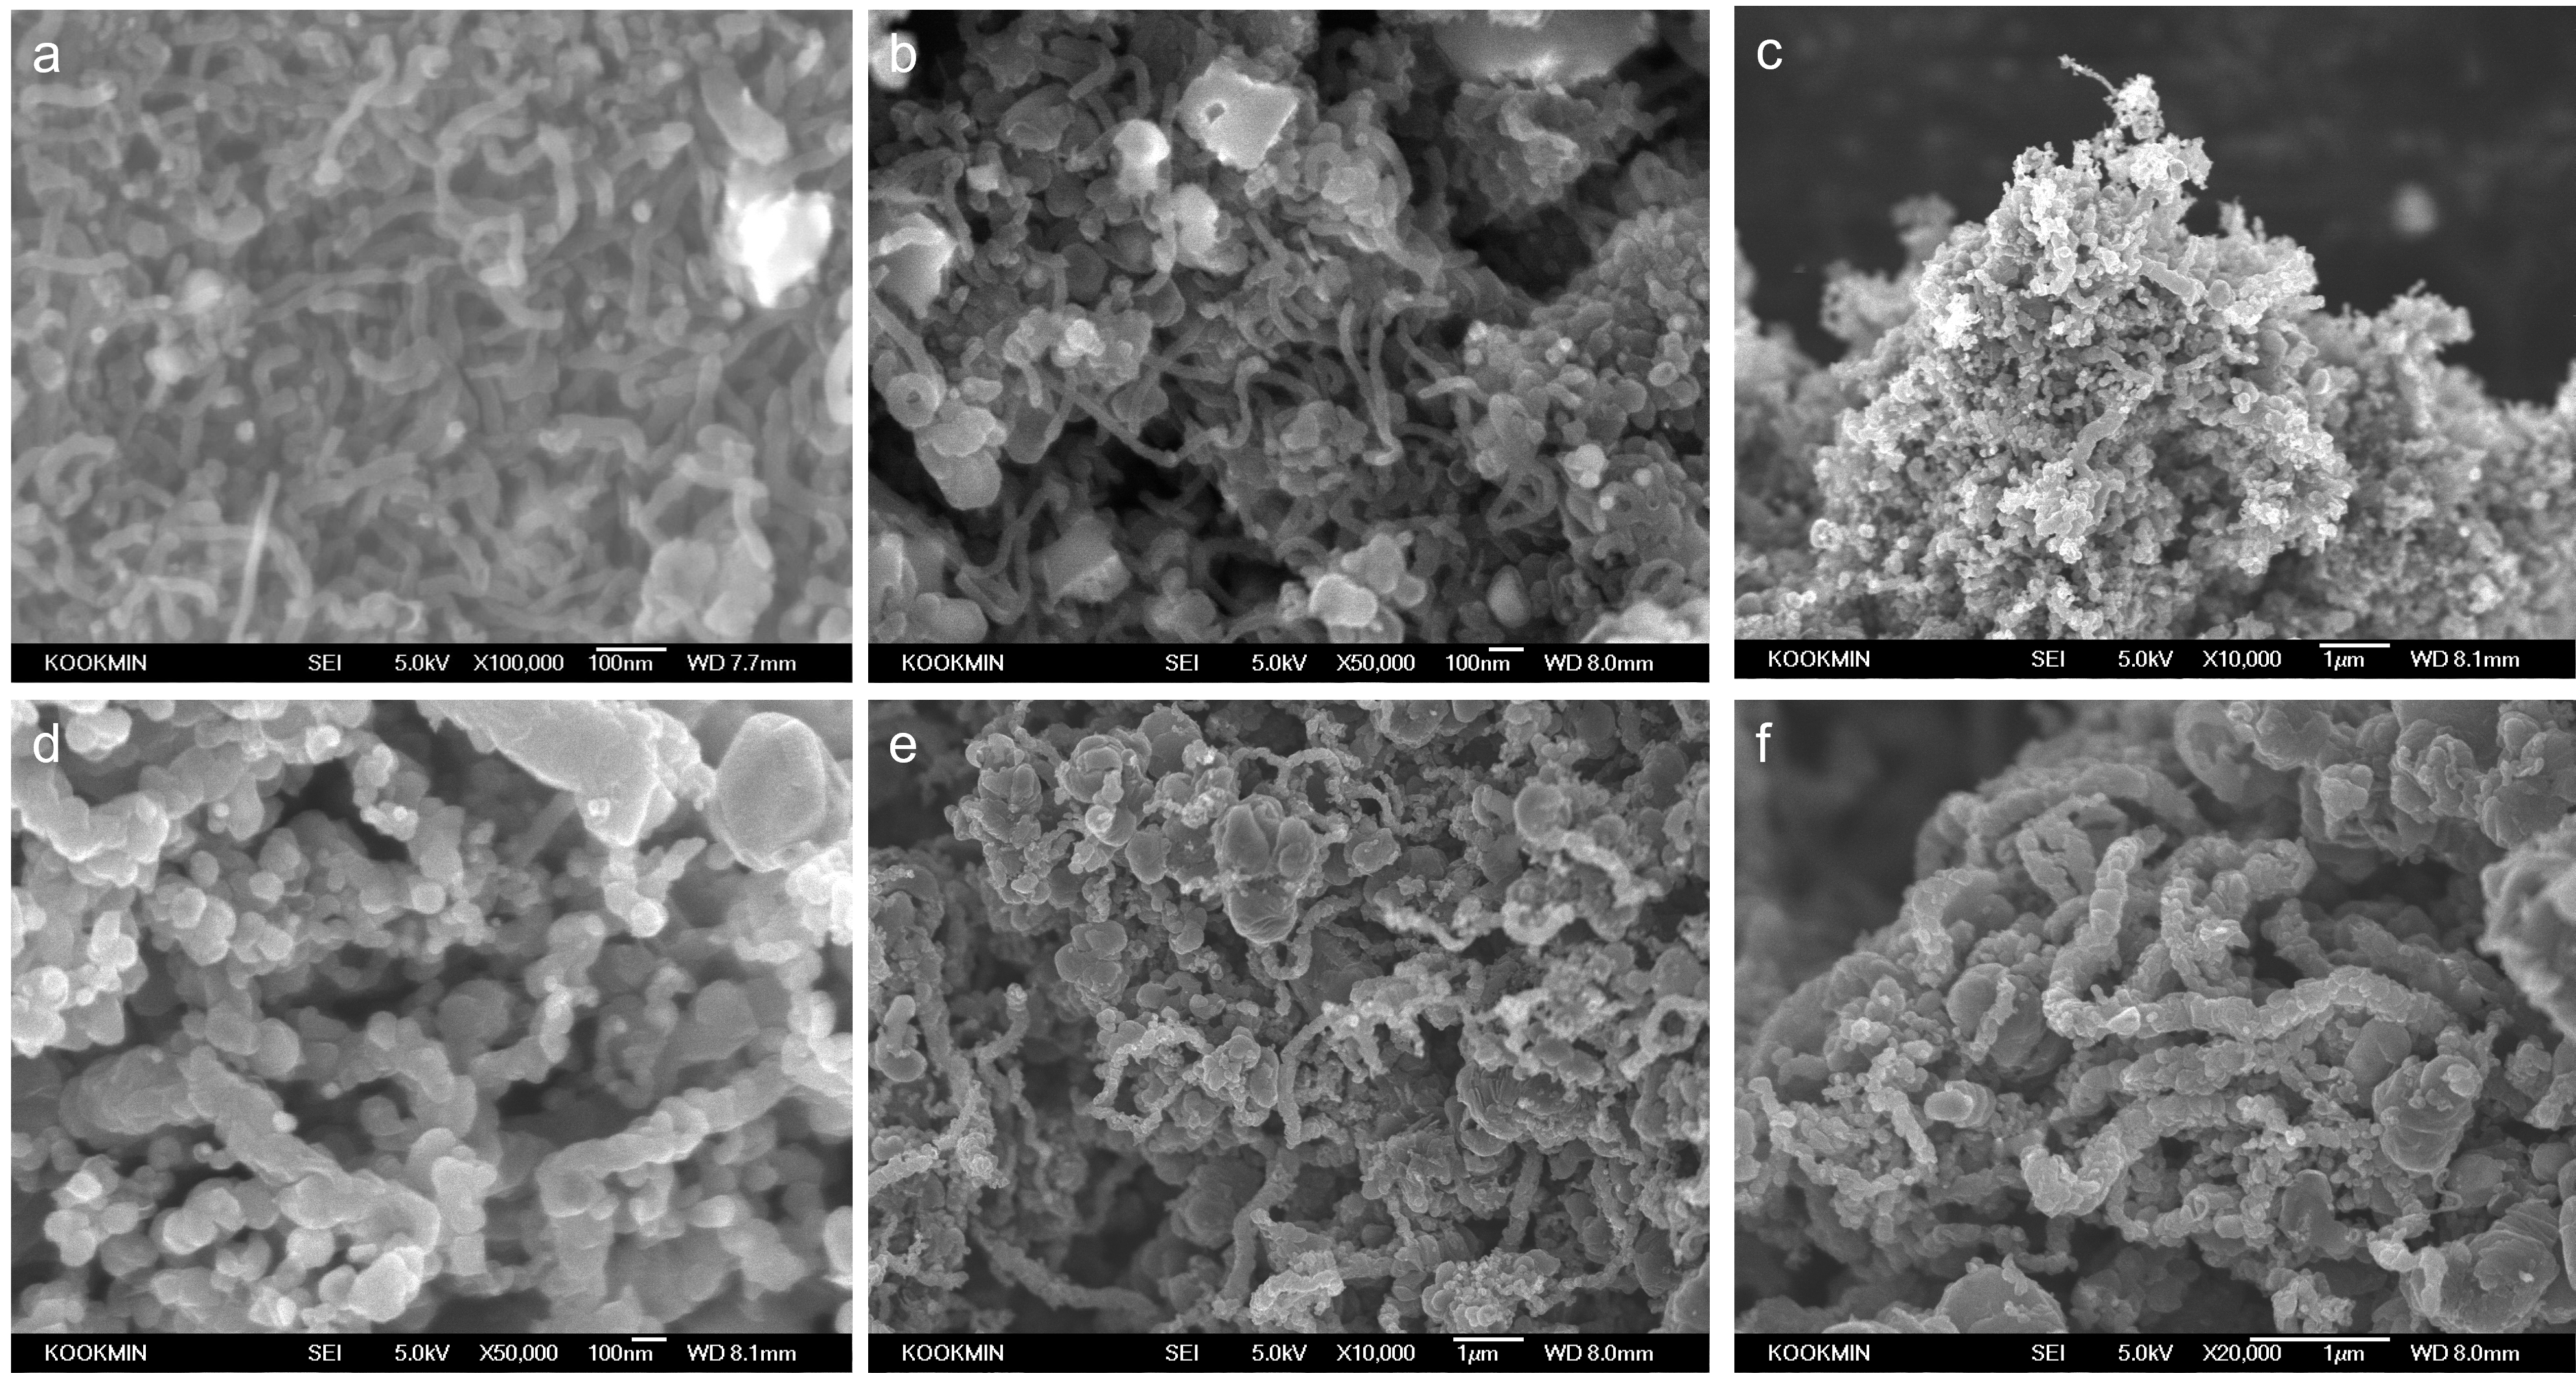
**

**Fig. S4** SEM image of the carbon product for (a and b) Li2CO3-LiCl electrolyte, and for (c and d) Li2CO3-LiCl- 3 mol% LiBO2 electrolyte.


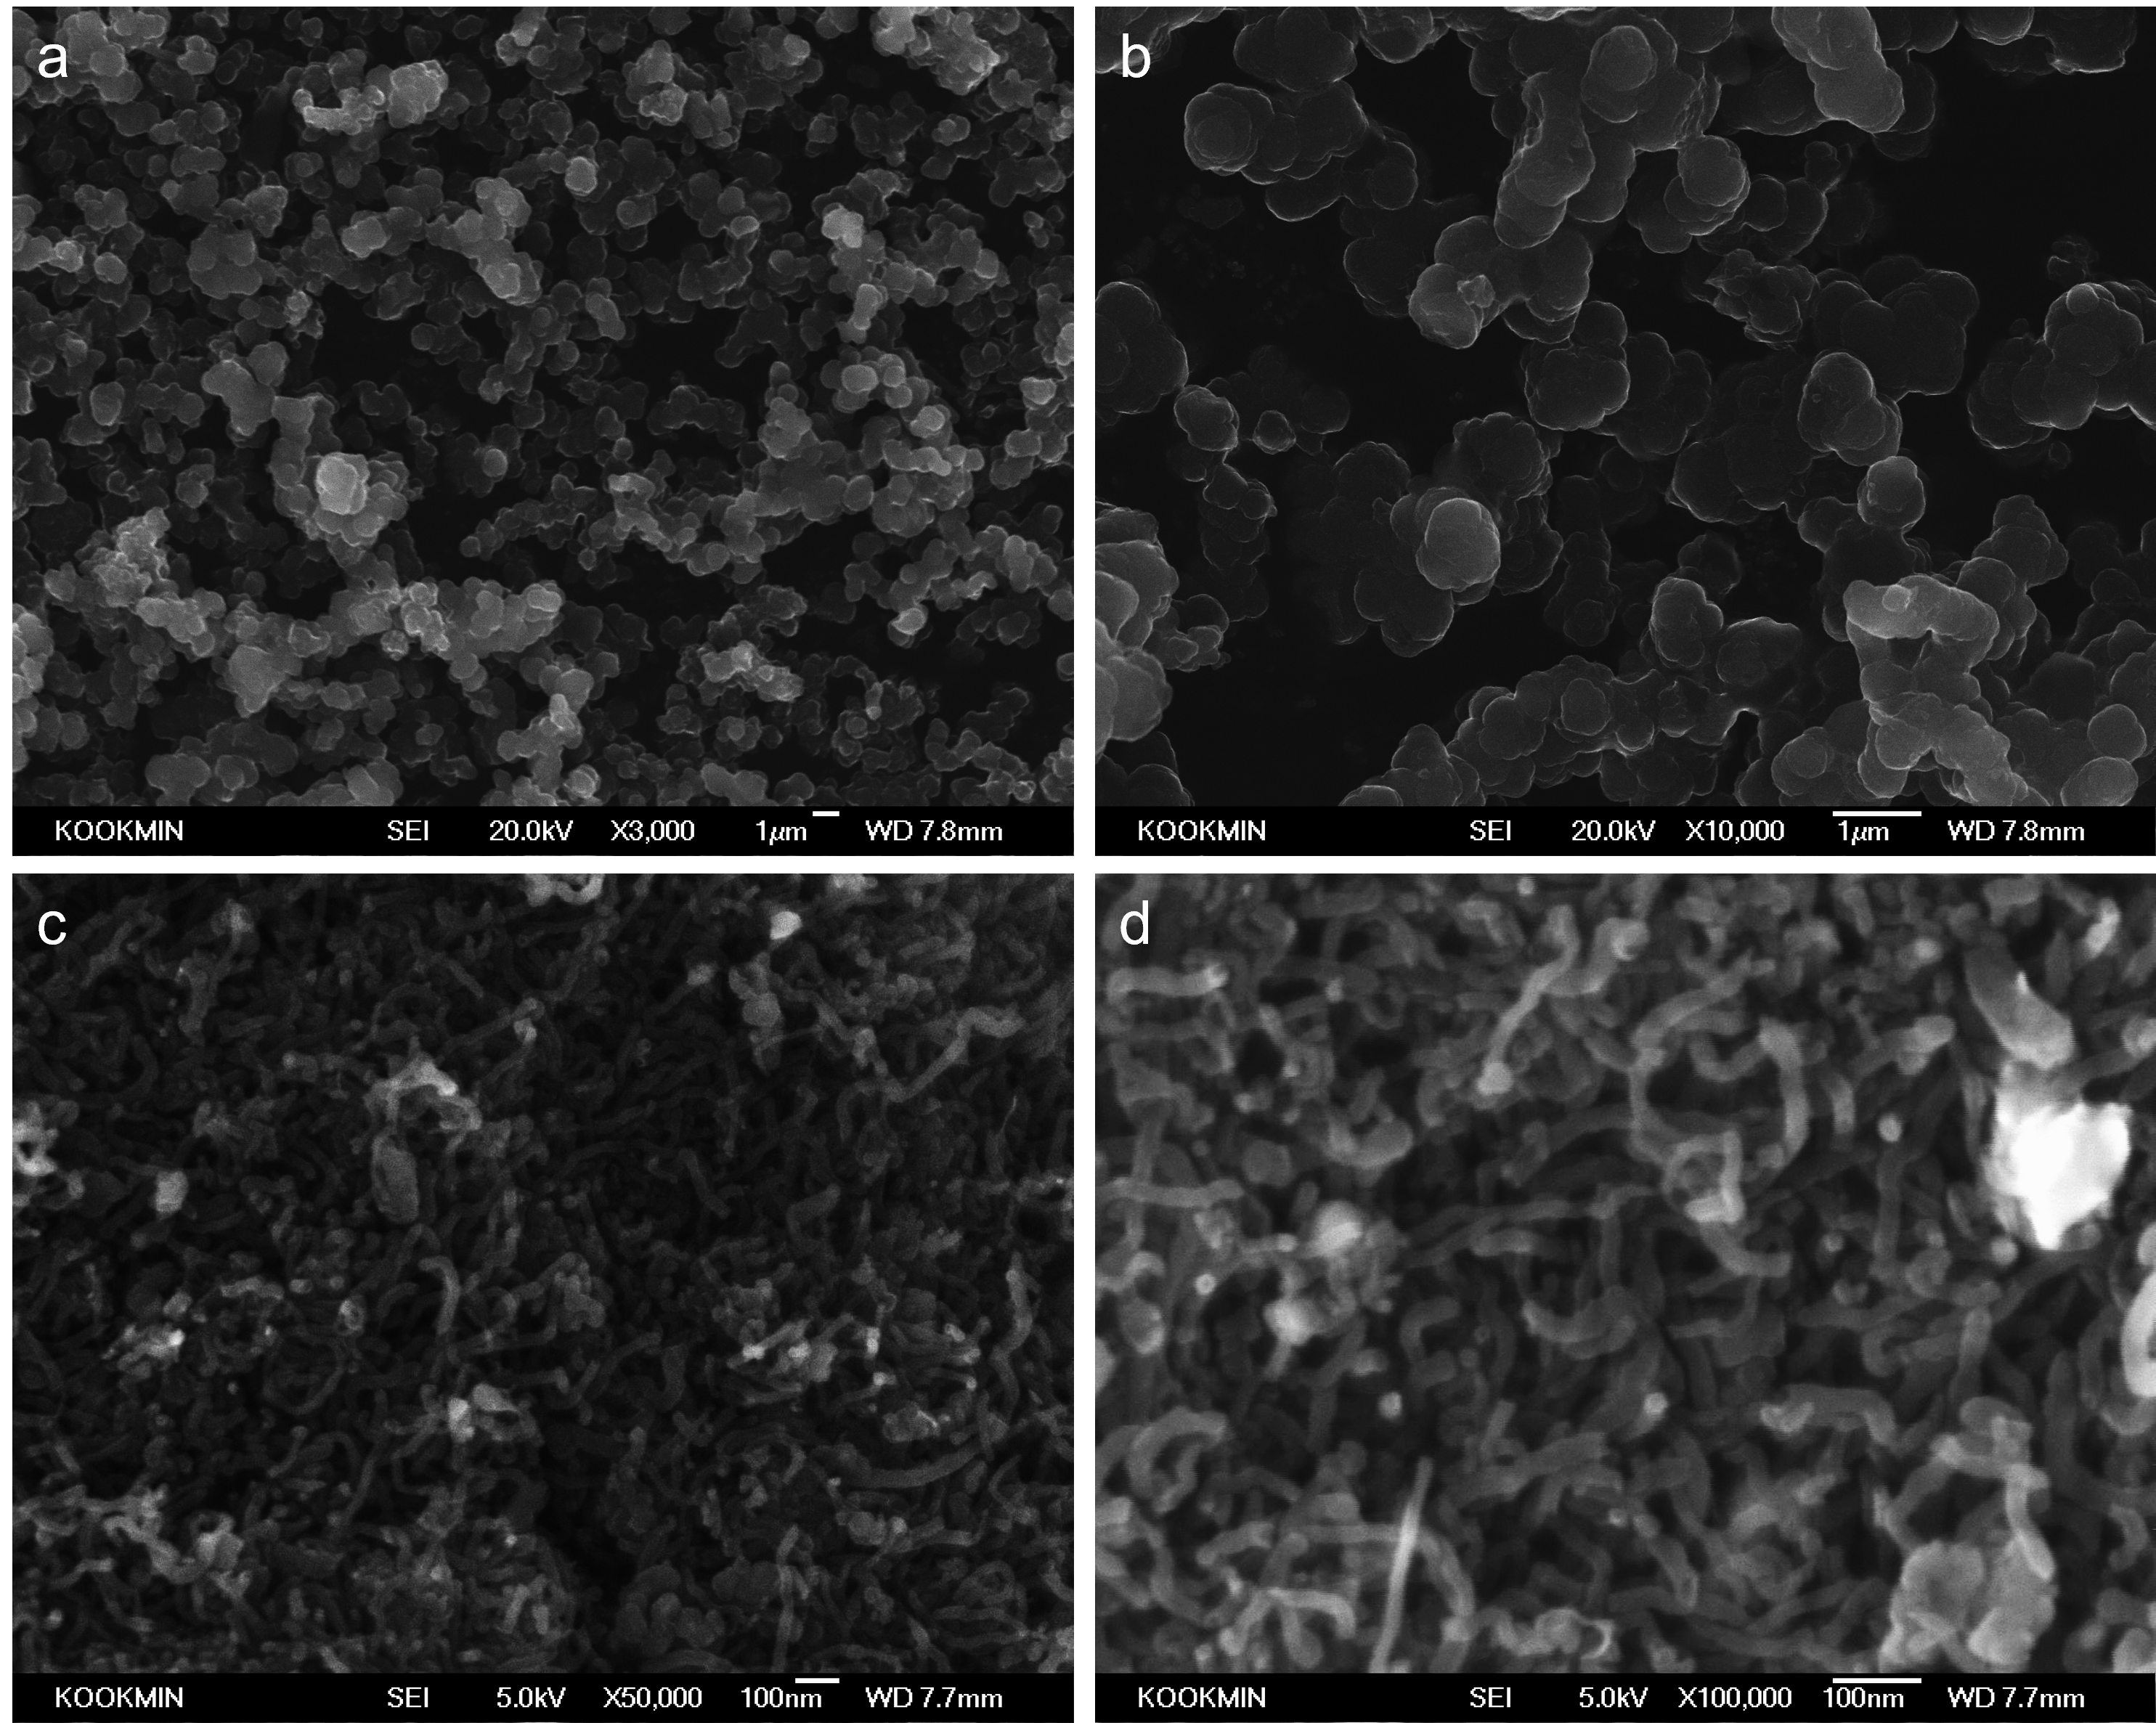


**Fig. S5** XRD analysis result of the CNT for Li2CO3-LiCl- 3 mol% LiBO2 electrolyte at current density of 25 mA cm-2.


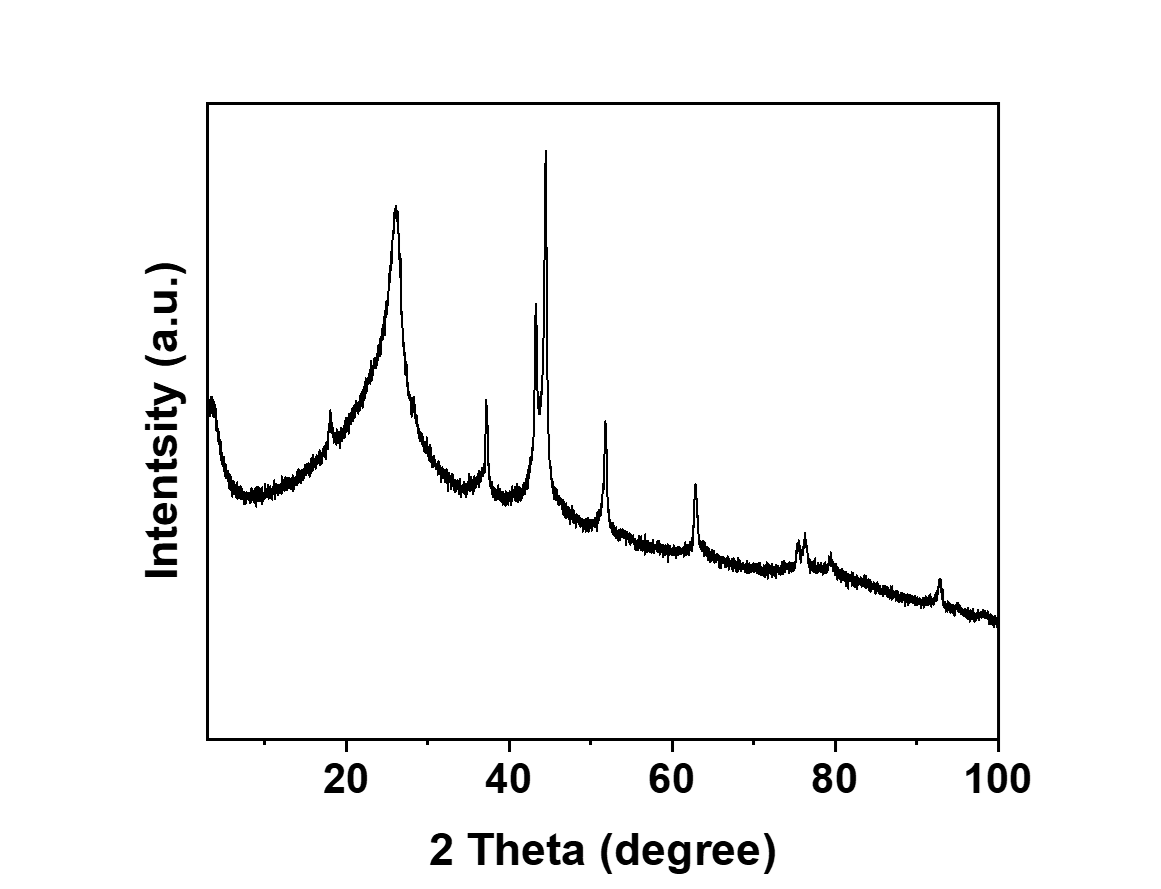


**Table S1**. Elemental ratio determined through SEM-EDS mapping

| **Element** | **Wt%** | **At%** |
| --- | --- | --- |
| **C** | **97.00** | **98.95** |
| **O** | **0.74** | **0.56** |
| **Cr** | **0.44** | **0.10** |
| **Fe** | **0.54** | **0.12** |
| **Ni** | **1.28** | **0.27** |

**Table S2**. Specifications of CNT products obtained by earlier studies through molten salt electroreduction and CNTs prepared in the current study.

| **Reference** | **CNT synthesis condition** | **Diameter**  **(nm)** | **BET surface area**  **(m2 g-1)** | **Crystallinity**  **(G/D ratio)** |
| --- | --- | --- | --- | --- |
|  | Li2CO3-Na2CO3-ZnO (1 wt%) at 750°C, current density of 5 mA cm-2 for 15 min, 10 mA cm-2 for 15 min, 20 mA cm-2 for 5 min and 200 mA cm-2 for 60 min. | 37.6 | - | 1.3 |
|  | Li2CO3 with 0.5 nm Fe additive at 750°C, 100 mA cm-2 for 60 min. | 23 | - | 1.8 |
|  | Li2CO3-LiBO2 (10 wt%) at 770°C, 0.05 A for 19 min, 0.1 A for 10 min, 0.2 A for 5 min, 0.4 A for 5 min and 0.8~1.0 A for 60 min. | 350 | - | 1.2 |
|  | Li2CO3 at 750°C, 100 mA cm-2 for 60 min. | 29 | - | 0.56 |
|  | Li2CO3 -Fe2O3 (0.1 wt%) at 770°C, 0.15 A cm-2for 4 h. | 200 | - | 2.17 |
|  | Li2CO3­­-Li2O-Fe2O3 (1 wt%) at 750°C, 0.6  A cm-2for 30 min. | 100 | - | 6.6 |
| **NCCNT-25** | **Nucleation control by seed catalysts supplied from anodic reaction** | **26.3** | **1136.9** | **0.55** |
| **NCCNT-50** | **156.2** | **282.7** | **0.69** |
| **NCCNT-100** | **184.9** | **55.9** | **0.74** |

**Table S3**. Specifications of commercial CNTs, and CNTs prepared in the curent study.

| **CNT** | **Company** | **Diameter**  **(nm)** | **BET surface area**  **(m2 g-1)** | **Crystallinity**  **(G/D ratio)** |
| --- | --- | --- | --- | --- |
| FloTube 9000 | Cnano | 17.5 | 210 | 0.7 |
| NC7000 | Nanocyl | 9.5 | 280 | 0.6 |
| K-Nanos-100p | Kumho Petrochemical | 15 | 270 | 0.8 |
| JC142 | Jeio | 18.5 | 640 | 0.5 |
| SG-CNT HT | Zeon | 4 | 1080 | 4.6 |
| BT1001M | LG Chem | 10 | 250 | 1.5 |
| BT1003M | LG Chem | 13 | 186 | - |
| SNT SP95 | Carbon Nano Tech | 1.5 | 800 | 9 |
| **NCCNT-25** | **This work** | **26.3** | **1136.9** | **0.55** |
| **NCCNT-50** | **This work** | **156.2** | **282.7** | **0.69** |
| **NCCNT-100** | **This work** | **184.9** | **55.9** | **0.74** |
